# Supplementary material for: MicroRNA-101 regulated transcriptional modulator SUB1 plays a role in prostate cancer
Source: PubMed Central journal article supplement (PMC5140777; doi:10.1038/onc.2016.164), 2016-06-06

# Supplementary Figure S3

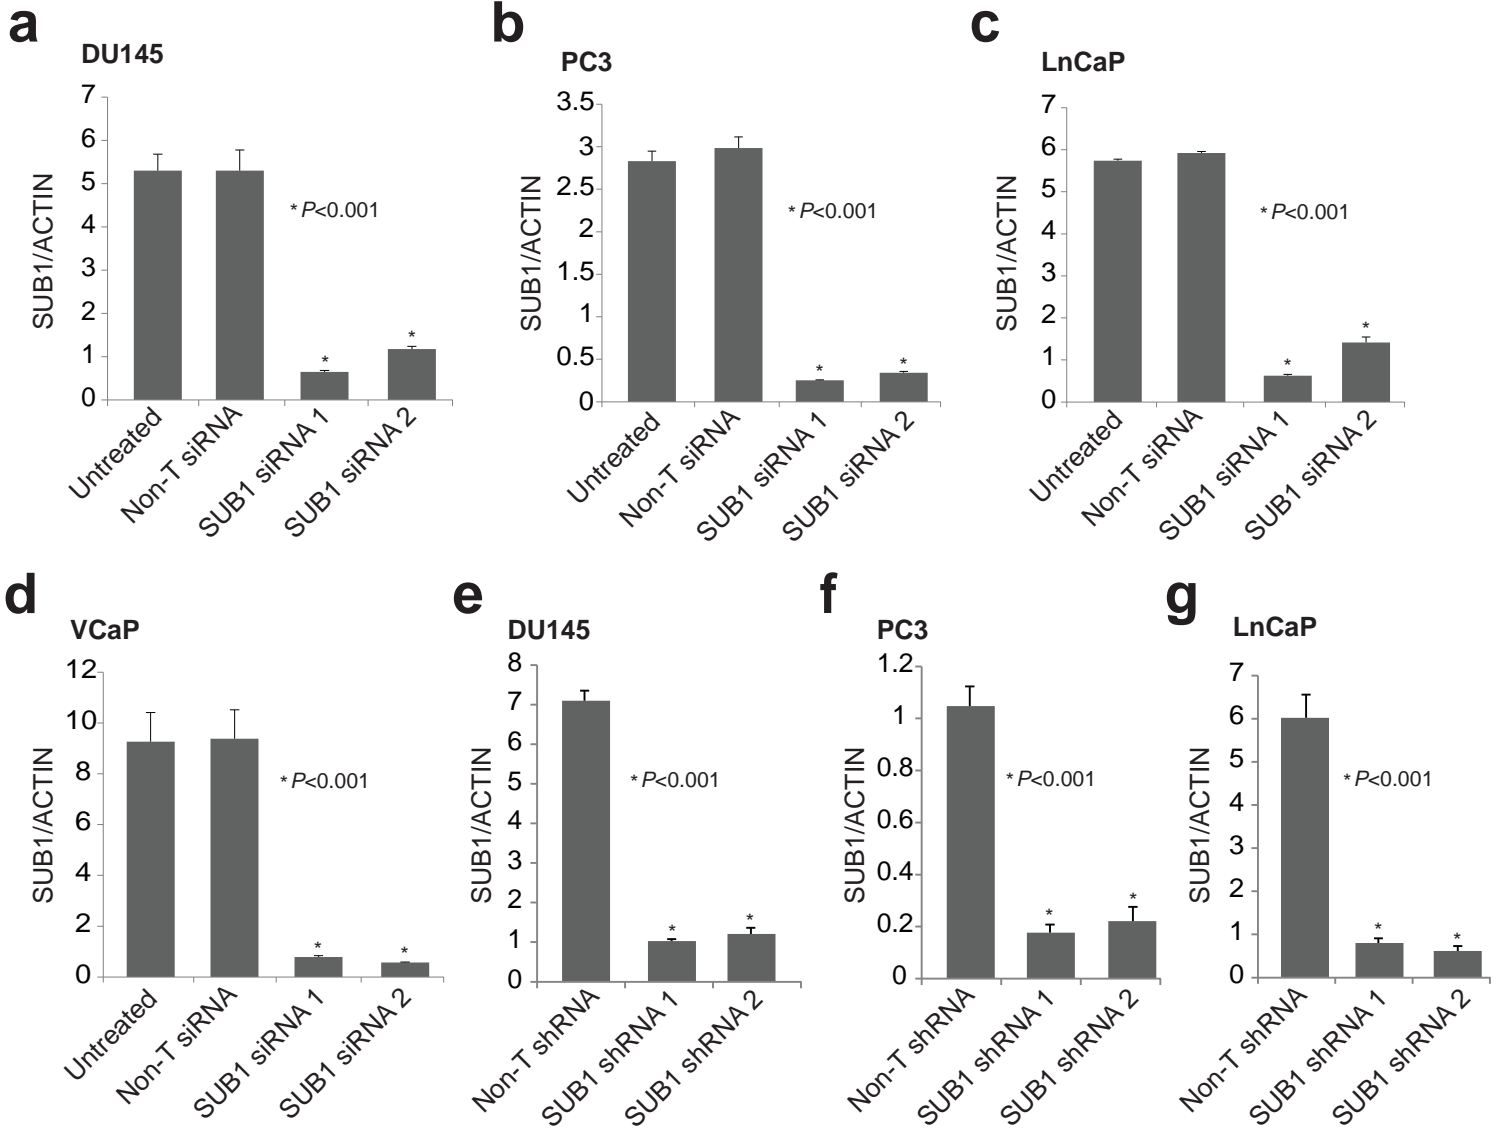

Supplement: onc2016164x4.pdf [file onc2016164x4.pdf]
