# Supplementary material for: MicroRNA-101 regulated transcriptional modulator SUB1 plays a role in prostate cancer
Source: PubMed Central journal article supplement (PMC5140777; doi:10.1038/onc.2016.164), 2016-06-06

# Supplementary Figure S4

**a**

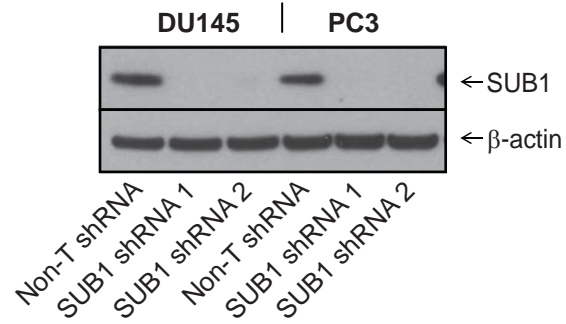

**b**

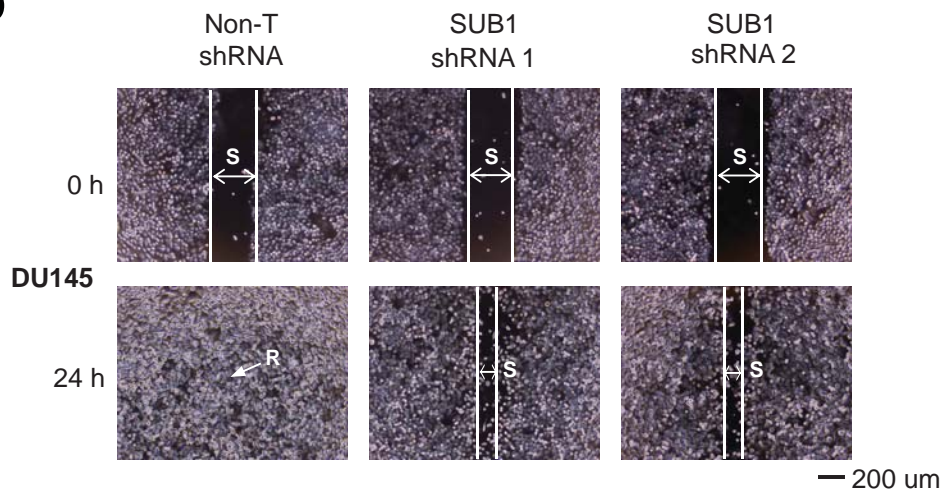

**c**

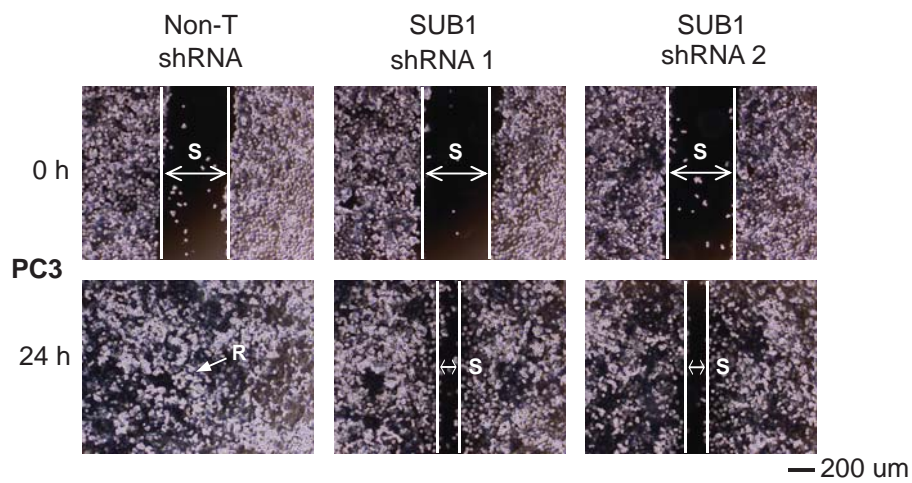

Supplement: onc2016164x5.pdf [file onc2016164x5.pdf]
